# Supplementary material for: Dye-sensitized solar cells based on cobalt-containing room temperature ionic liquid redox shuttles
Source: Royal Society of Chemistry journal article supplement (doi:10.1039/c6ra26402f), 2017-01-01
Supplement: c6ra26402f1.pdf [file c6ra26402f1.pdf]

## Electronic Supplementary Information

### Dye-Sensitized Solar Cells Based on Cobalt-containing Room Temperature Ionic Liquid Redox Shuttles

Zhenyong Wang, Lei Wang, Ye Zhang, Jiangna Guo, Hao Li and Feng Yan\*

Jiangsu Key Laboratory of Advanced Functional Polymer Design and Application,

Department of Polymer Science and Engineering, College of Chemistry, Chemical

Engineering and Materials Science, and Dye-sensitized solar cells, Soochow

University, Suzhou 215123, PR China

E-mail: [fyan@suda.edu.cn](mailto:fyan@suda.edu.cn)

**Table S1.** Photovoltaic performance of Cell A' and Cell B' under simulated AM 1.5 solar spectrum illumination at 100 mW cm<sup>-2</sup>. The DSSCs were characterized immediately after fabrication and the average performance of three devices (with standard deviations in parentheses) is provided.

| Cell | Composition                                                                                                                                    | $V_{oc}$<br>(mV) | $J_{sc}$<br>(mA cm <sup>-2</sup> ) | $FF$<br>(%) | $\eta$<br>(%) |
|------|------------------------------------------------------------------------------------------------------------------------------------------------|------------------|------------------------------------|-------------|---------------|
| A'   | 0.5M PMII, 0.05M I <sub>2</sub> , 0.2M LiClO <sub>4</sub> , 0.8M TBP in 1-butyl-3-methylimidazolium tetrafluoroborate (BMIBF <sub>4</sub> )    | 634(±4)          | 8.62(±0.3)                         | 63.8(±1.0)  | 3.5(±0.3)     |
| B'   | 0.5M PMII, 0.2M [BMI] <sub>2</sub> [Co(NCS) <sub>4</sub> ], 0.02M NOBF <sub>4</sub> , 0.8M TBP, 0.2 M LiClO <sub>4</sub> in BMIBF <sub>4</sub> | 684(±3)          | 6.26(±0.2)                         | 55.6(±1.1)  | 2.4(±0.1)     |

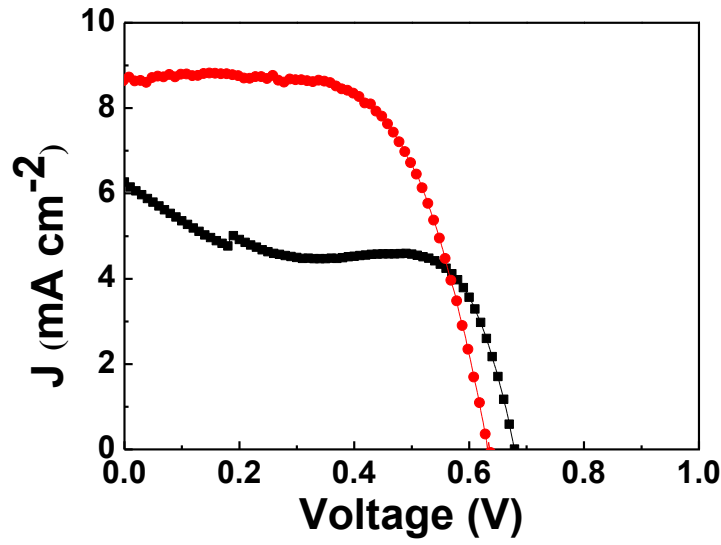

**Fig. S1** The  $J$ - $V$  curves of Cell A' (—■—) and Cell B' (—●—) under the simulated AM 1.5 solar spectrum irradiation at 100 mW cm<sup>-2</sup>. Cells were tested using an aluminum foil mask with an aperture area of 0.1 cm<sup>2</sup>. Poor fill factor (FF) and low efficiency of the devices were obtained.

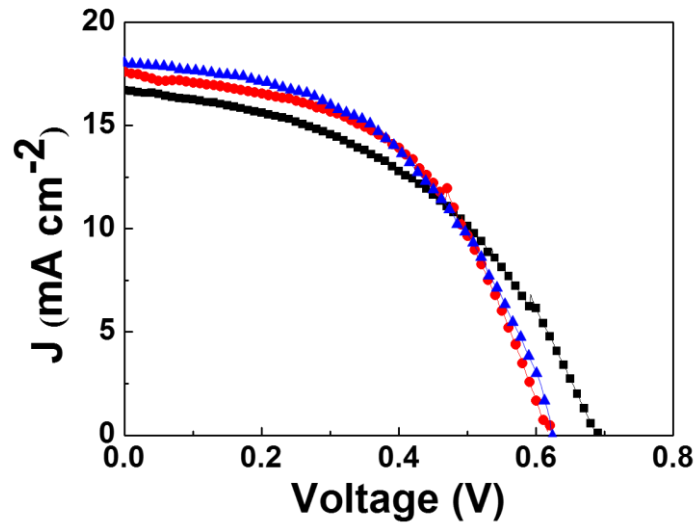

**Fig. S2** The  $J$ - $V$  curves of Cell C (—■—), Cell D (—●—) and Cell E (—▲—) under the simulated AM 1.5 solar spectrum irradiation at 100 mW cm<sup>-2</sup>. Cells were tested using an aluminum foil mask with an aperture area of 0.1 cm<sup>2</sup>.

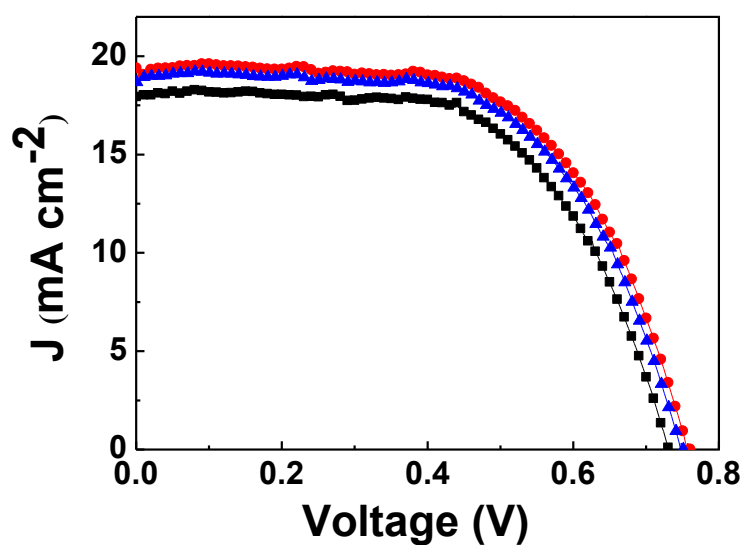

**Fig. S3** J-V curve of Cell B on the 1<sup>st</sup> day (—■—), 30<sup>th</sup> day (—●—) and 120<sup>th</sup> day (—▲—) testing under the simulated AM 1.5 solar spectrum irradiation at 100 mW cm<sup>-2</sup>. The Cell was tested using an aluminum foil mask with an aperture area of 0.1 cm<sup>2</sup>.

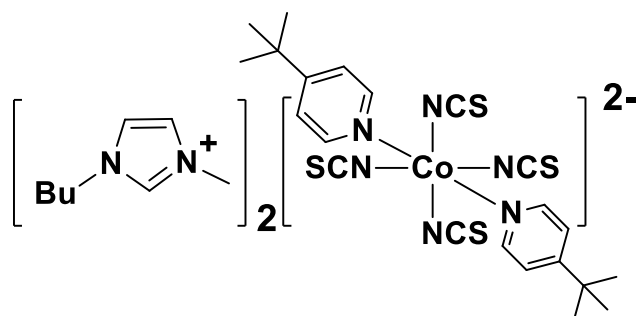

**Scheme S1** Chemical structure of [BMI]<sub>2</sub>[Co(NCS)<sub>4</sub>(TBP)<sub>2</sub>]

[BMI]<sub>2</sub>[Co(NCS)<sub>4</sub>(TBP)<sub>2</sub>]: FTIR (KBr) (cm<sup>-1</sup>): 3140, 3086, 2952, 2925, 2866, 2063, 1613, 1569, 1494, 1456, 1411, 1384, 1158, 1102, 1012, 959, 825, 740, 645, 622. Elemental analysis Calcd.: C, 54.33%; H, 6.72%; N, 16.67%. Found: C, 53.11%; H, 6.39%; N, 17.26%.
